# Supplementary material for: Chinese Color Nest Project : An accelerated longitudinal brain-mind cohort
Source: PubMed Central journal article supplement (PMC8517840; doi:10.1016/j.dcn.2021.101020), 2021-10-11

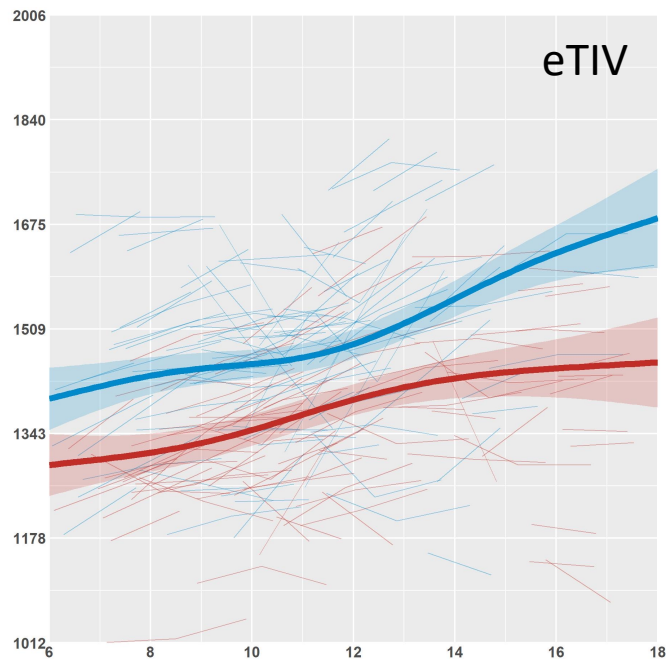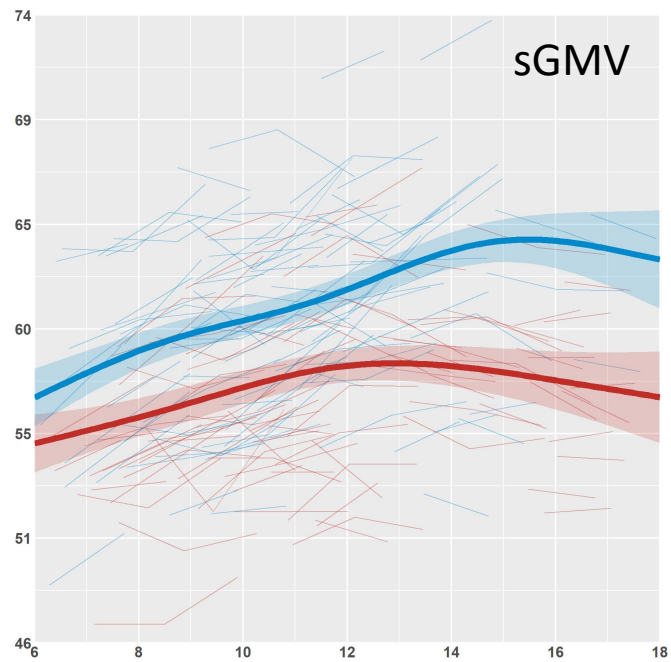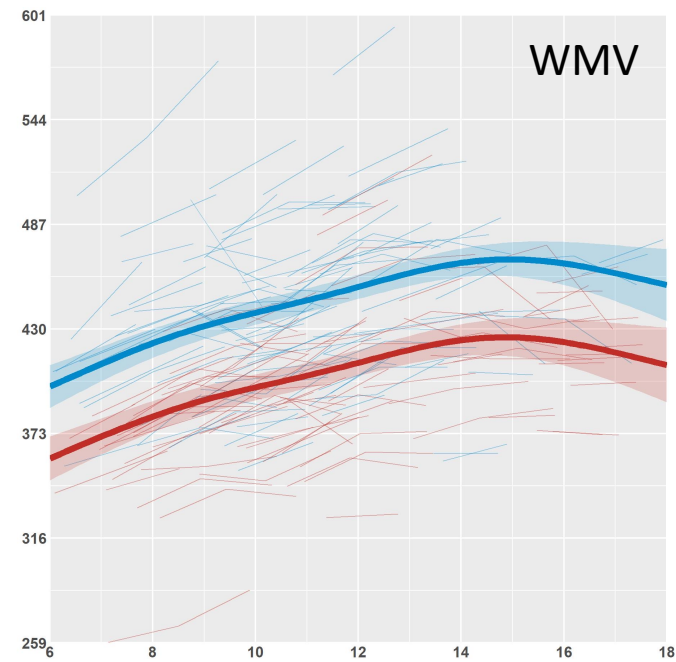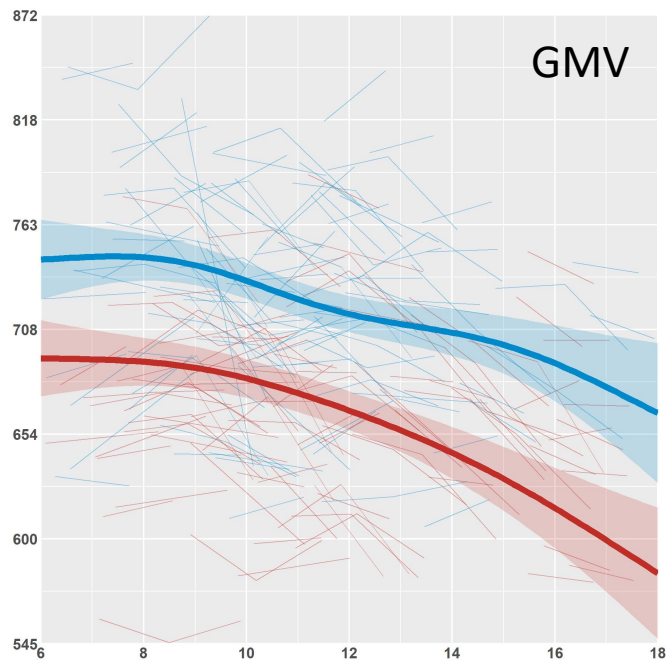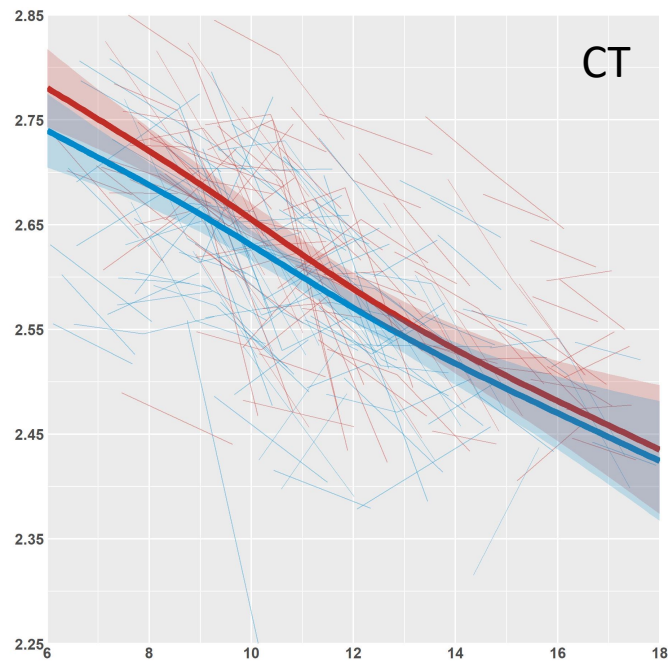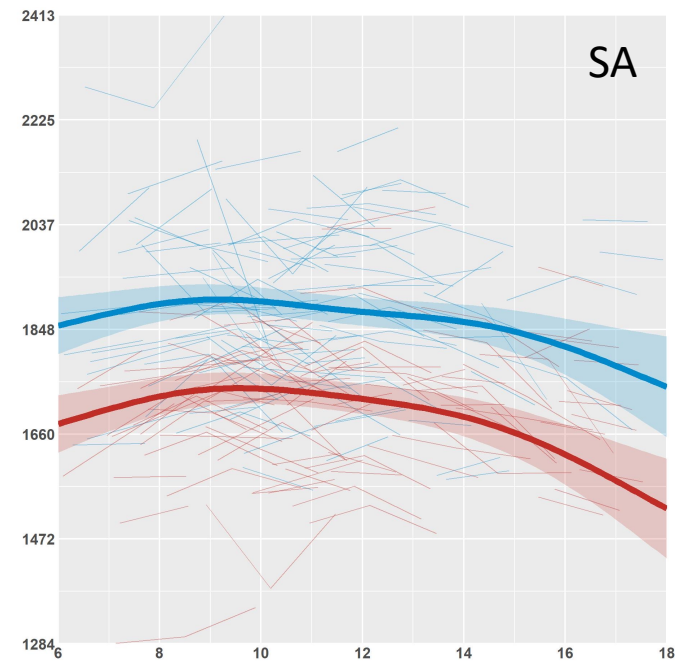

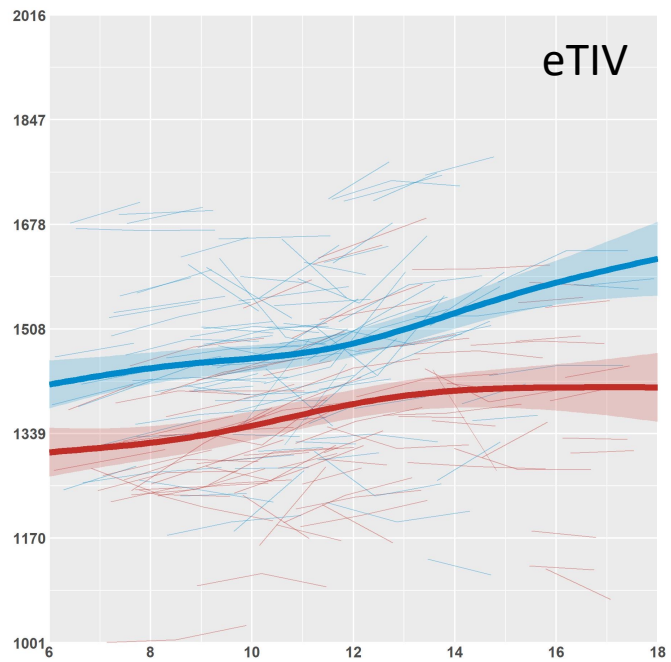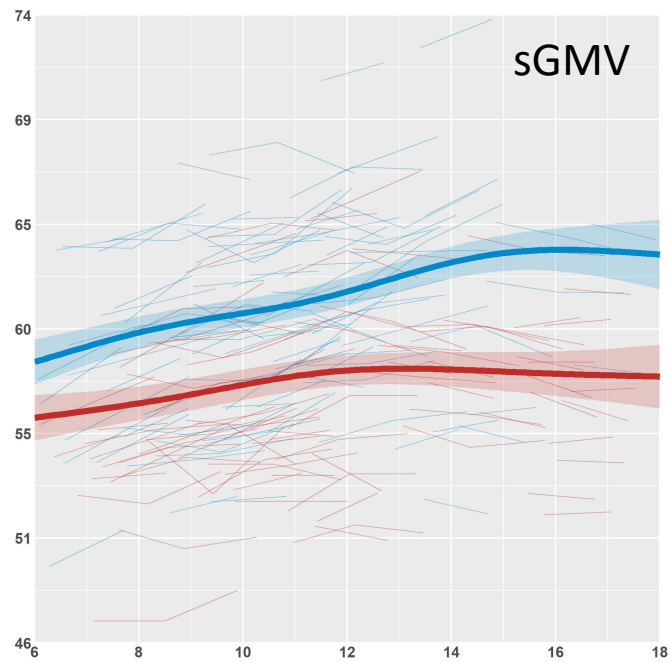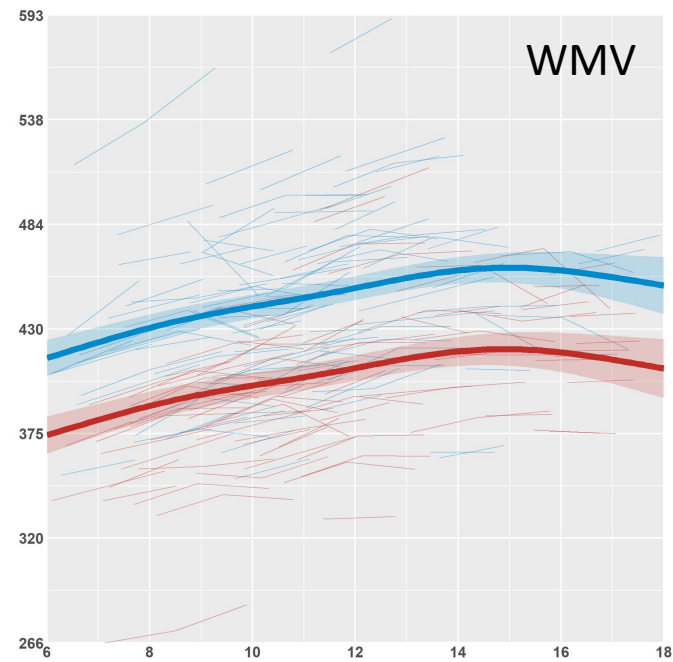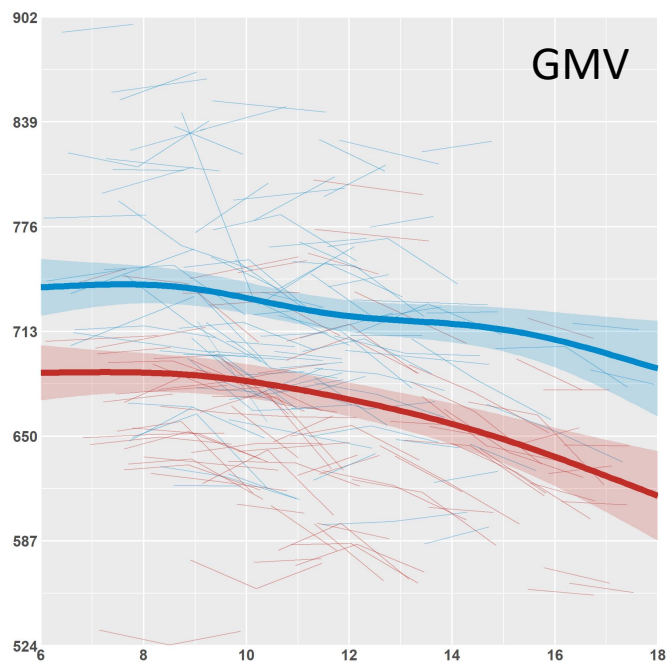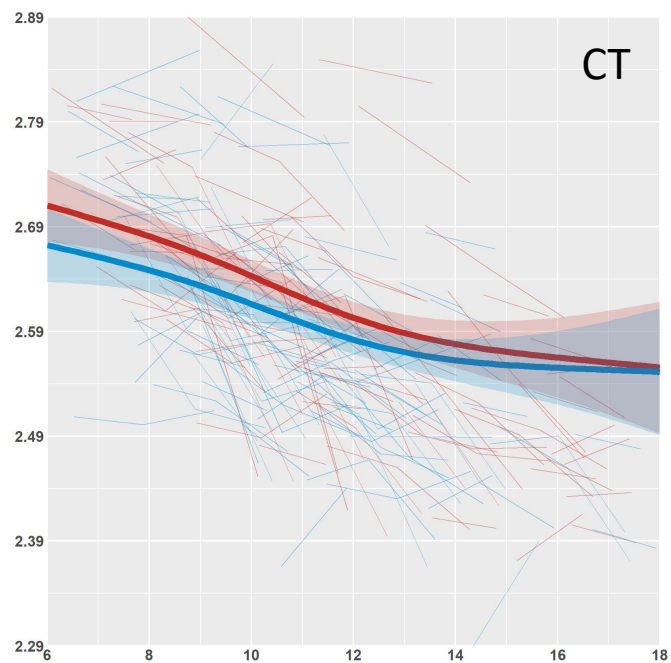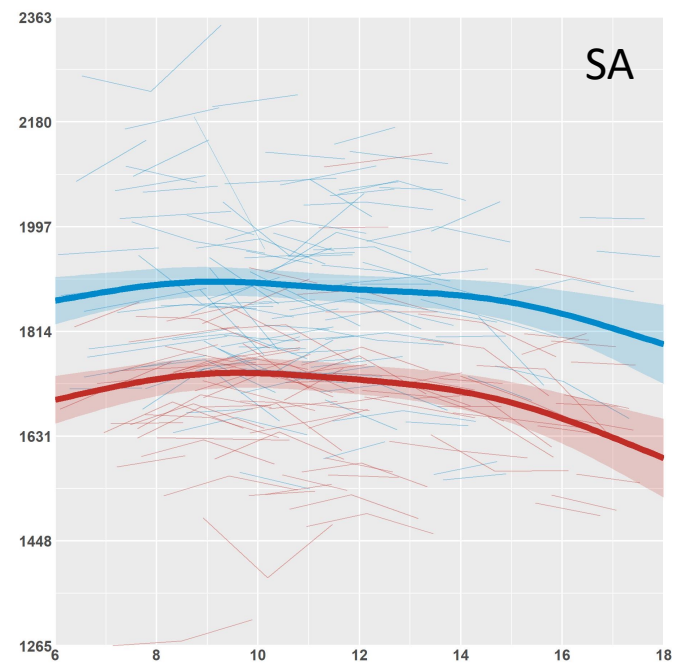

Supplement: mmc1.pdf [file mmc1.pdf]
